# Supplementary material for: Tumor-Infiltrating Lymphocytes in the Tumor Microenvironment of Laryngeal Squamous Cell Carcinoma: Systematic Review and Meta-Analysis
Source: MDPI journal article supplement (doi:10.3390/biomedicines9050486), 2021-04-28
Supplement: s1 [file s1]

## SUPPLEMENTARY MATERIAL

Supplementary Table 1: Search strategy in PubMed

|                                                                                                                                                                                                                                                                                                                                                                                                                                                                                                                                                                                                                                                                                                                                                                                                                                                                                                                                                                                                                                                                                                                                                                                                                                                                                                                                                                                                                                                                                                                                                                                                                                                                                                                                                                                                                                                                                                                                        |
|----------------------------------------------------------------------------------------------------------------------------------------------------------------------------------------------------------------------------------------------------------------------------------------------------------------------------------------------------------------------------------------------------------------------------------------------------------------------------------------------------------------------------------------------------------------------------------------------------------------------------------------------------------------------------------------------------------------------------------------------------------------------------------------------------------------------------------------------------------------------------------------------------------------------------------------------------------------------------------------------------------------------------------------------------------------------------------------------------------------------------------------------------------------------------------------------------------------------------------------------------------------------------------------------------------------------------------------------------------------------------------------------------------------------------------------------------------------------------------------------------------------------------------------------------------------------------------------------------------------------------------------------------------------------------------------------------------------------------------------------------------------------------------------------------------------------------------------------------------------------------------------------------------------------------------------|
| <p><b>Search:</b><br/> <b>(tumor-infiltrating lymphocytes) AND (((head and neck squamous cell carcinoma) OR (head and neck cancer) OR (larynx squamous cell carcinoma) OR (laryngeal cancer))))</b><br/> ("tumour infiltrating lymphocytes"[All Fields] OR "lymphocytes, tumor infiltrating"[MeSH Terms] OR ("lymphocytes"[All Fields] AND "tumor infiltrating"[All Fields]) OR "tumor-infiltrating lymphocytes"[All Fields] OR ("tumor"[All Fields] AND "infiltrating"[All Fields] AND "lymphocytes"[All Fields]) OR "tumor infiltrating lymphocytes"[All Fields]) AND ("squamous cell carcinoma of head and neck"[MeSH Terms] OR ("squamous"[All Fields] AND "cell"[All Fields] AND "carcinoma"[All Fields] AND "head"[All Fields] AND "neck"[All Fields]) OR "squamous cell carcinoma of head and neck"[All Fields] OR ("head"[All Fields] AND "neck"[All Fields] AND "squamous"[All Fields] AND "cell"[All Fields] AND "carcinoma"[All Fields]) OR "head and neck squamous cell carcinoma"[All Fields] OR ("head and neck neoplasms"[MeSH Terms] OR ("head"[All Fields] AND "neck"[All Fields] AND "neoplasms"[All Fields]) OR "head and neck neoplasms"[All Fields] OR ("head"[All Fields] AND "neck"[All Fields] AND "cancer"[All Fields]) OR "head and neck cancer"[All Fields]) OR ("squamous cell carcinoma of head and neck"[MeSH Terms] OR ("squamous"[All Fields] AND "cell"[All Fields] AND "carcinoma"[All Fields] AND "head"[All Fields] AND "neck"[All Fields]) OR "squamous cell carcinoma of head and neck"[All Fields] OR ("larynx"[All Fields] AND "squamous"[All Fields] AND "cell"[All Fields] AND "carcinoma"[All Fields]) OR "larynx squamous cell carcinoma"[All Fields]) OR ("laryngeal neoplasms"[MeSH Terms] OR ("laryngeal"[All Fields] AND "neoplasms"[All Fields]) OR "laryngeal neoplasms"[All Fields] OR ("laryngeal"[All Fields] AND "cancer"[All Fields]) OR "laryngeal cancer"[All Fields]))</p>   |
| <p><b>Translations</b><br/> <b>tumor-infiltrating lymphocytes:</b> "tumour infiltrating lymphocytes"[All Fields] OR "lymphocytes, tumor-infiltrating"[MeSH Terms] OR ("lymphocytes"[All Fields] AND "tumor-infiltrating"[All Fields]) OR "tumor-infiltrating lymphocytes"[All Fields] OR ("tumor"[All Fields] AND "infiltrating"[All Fields] AND "lymphocytes"[All Fields]) OR "tumor infiltrating lymphocytes"[All Fields]<br/> <b>head and neck squamous cell carcinoma:</b> "squamous cell carcinoma of head and neck"[MeSH Terms] OR ("squamous"[All Fields] AND "cell"[All Fields] AND "carcinoma"[All Fields] AND "head"[All Fields] AND "neck"[All Fields]) OR "squamous cell carcinoma of head and neck"[All Fields] OR ("head"[All Fields] AND "neck"[All Fields] AND "squamous"[All Fields] AND "cell"[All Fields] AND "carcinoma"[All Fields]) OR "head and neck squamous cell carcinoma"[All Fields]<br/> <b>head and neck cancer:</b> "head and neck neoplasms"[MeSH Terms] OR ("head"[All Fields] AND "neck"[All Fields] AND "neoplasms"[All Fields]) OR "head and neck neoplasms"[All Fields] OR ("head"[All Fields] AND "neck"[All Fields] AND "cancer"[All Fields]) OR "head and neck cancer"[All Fields]<br/> <b>larynx squamous cell carcinoma:</b> "squamous cell carcinoma of head and neck"[MeSH Terms] OR ("squamous"[All Fields] AND "cell"[All Fields] AND "carcinoma"[All Fields] AND "head"[All Fields] AND "neck"[All Fields]) OR "squamous cell carcinoma of head and neck"[All Fields] OR ("larynx"[All Fields] AND "squamous"[All Fields] AND "cell"[All Fields] AND "carcinoma"[All Fields]) OR "larynx squamous cell carcinoma"[All Fields]<br/> <b>laryngeal cancer:</b> "laryngeal neoplasms"[MeSH Terms] OR ("laryngeal"[All Fields] AND "neoplasms"[All Fields]) OR "laryngeal neoplasms"[All Fields] OR ("laryngeal"[All Fields] AND "cancer"[All Fields]) OR "laryngeal cancer"[All Fields]</p> |
| <p><b>Results: N=950</b></p>                                                                                                                                                                                                                                                                                                                                                                                                                                                                                                                                                                                                                                                                                                                                                                                                                                                                                                                                                                                                                                                                                                                                                                                                                                                                                                                                                                                                                                                                                                                                                                                                                                                                                                                                                                                                                                                                                                           |
